# Supplementary material for: Cobalt nanoparticles embedded in porous N-doped carbon as long-life catalysts for hydrolysis of ammonia borane
Source: Royal Society of Chemistry journal article supplement (doi:10.1039/c5cy01756d), 2015-12-08
Supplement: c5cy01756d1.pdf [file c5cy01756d1.pdf]

**Cobalt nanoparticles embedded in porous N-doped carbon as a  
long-life catalyst for hydrolysis of ammonia borane**

**Table S1** The content of N, C and Co element in Co@N-C composites.

| Co@N-C | N wt% | C wt% |
|--------|-------|-------|
| 600-1h | 5.04  | 62.2  |
| 700-1h | 1.46  | 68.77 |
| 800-1h | 0.69  | 69.57 |

**Table S2** The content of Co determined by ICP-AES

| Catalysts | Co/N-C-600 | Co/N-C -700 | Co/N-C -800 | Co-N-C |
|-----------|------------|-------------|-------------|--------|
| Co wt%    | 16.5       | 19.7        | 25.3        | 24.8   |

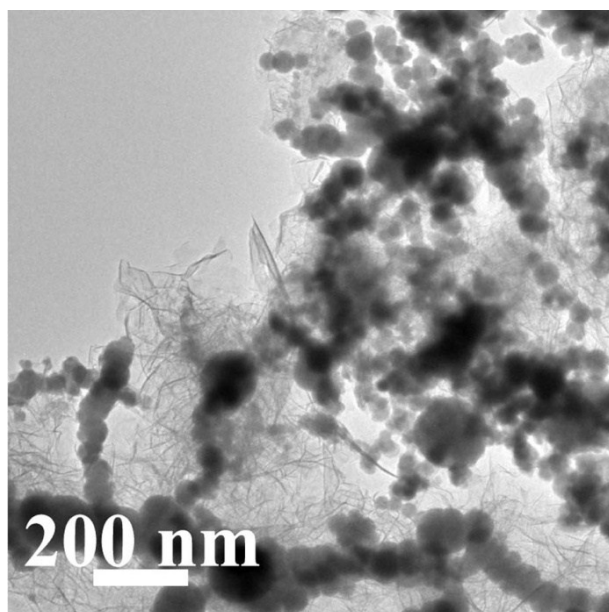

Fig. S1 TEM image of Co/N-C catalyst.

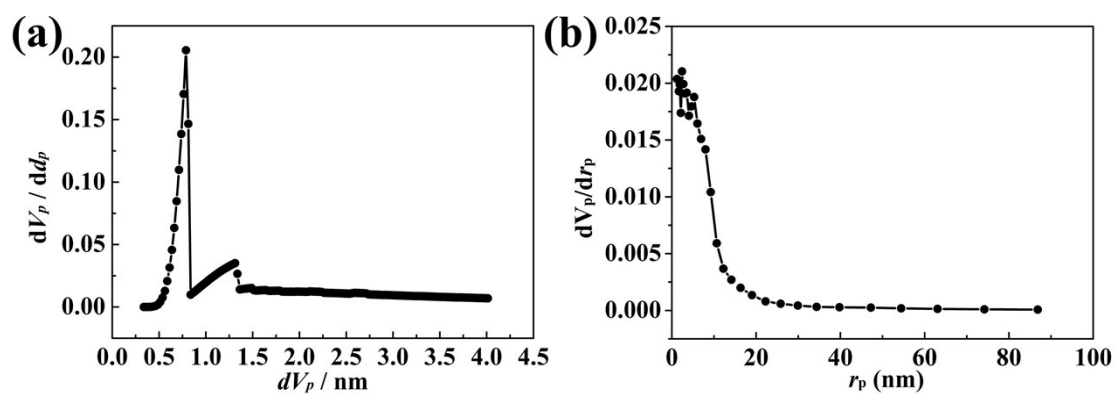

Fig. S2 (a) Micropore and (b) mesopore size distribution of Co@N-C-700 determined from the Horvath-Kawazoe (HK) method and Barrett-Joyner-Halenda method, respectively.
